# Supplementary material for: NO Synthesis in Immune-Challenged Locust Hemocytes and Potential Signaling to the CNS
Source: MDPI journal article supplement (doi:10.3390/insects12100951), 2021-10-18
Supplement: s1 [file s1]

## Supplementary information

# NO Synthesis in Immune-Challenged Locust Hemocytes and Potential Signaling to the CNS

Stella Bergmann <sup>1</sup>, Jan-Phillipp Gerhards <sup>1</sup>, Anne Schmitz <sup>1</sup>, Stefanie C. Becker <sup>2</sup> and Michael Stern <sup>1,\*</sup>

<sup>1</sup> Institute for Physiology and Cell Biology, University of Veterinary Medicine Hannover, 30173 Hannover, Germany; stella.bergmann@tiho-hannover.de (S.B.); jan-phillipp97@web.de (J.-P.G.); as\_anne.schmitz@web.de (A.S.)

<sup>2</sup> Institute for Parasitology, University of Veterinary Medicine Hannover, 30559 Hannover, Germany; stefanie.becker@tiho-hannover.de

\* Correspondence: michael.stern@tiho-hannover.de; Tel.: +49-511-856-7767

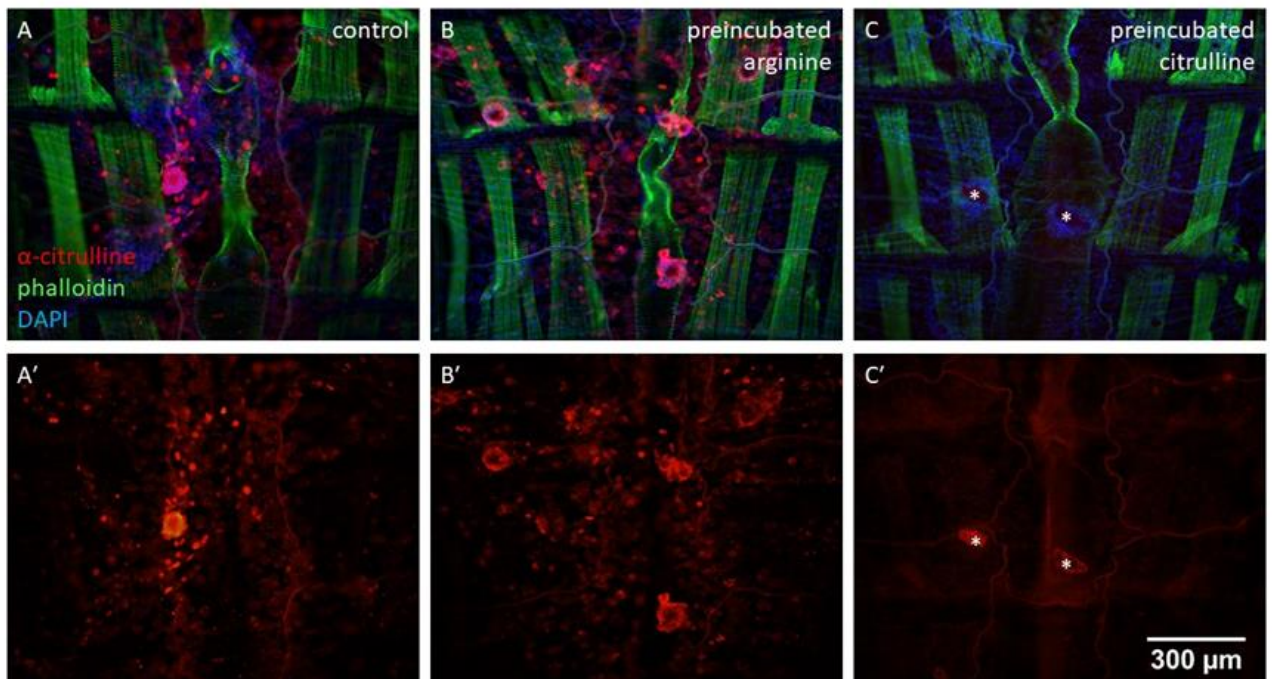

**Figure S1** Testing of preincubated anti-citrulline antibody with BSA-conjugated amino acids on dorsal abdomens of first instar locust injected with  $5 \times 10^5$  CFU heat-inactivated *E. coli* after 24h **A** control **B** preincubated with BSA-conjugated arginine 100mM (1:200) **C** preincubated with BSA-conjugated citrulline 100mM (1:200), asterisks indicate capsules.

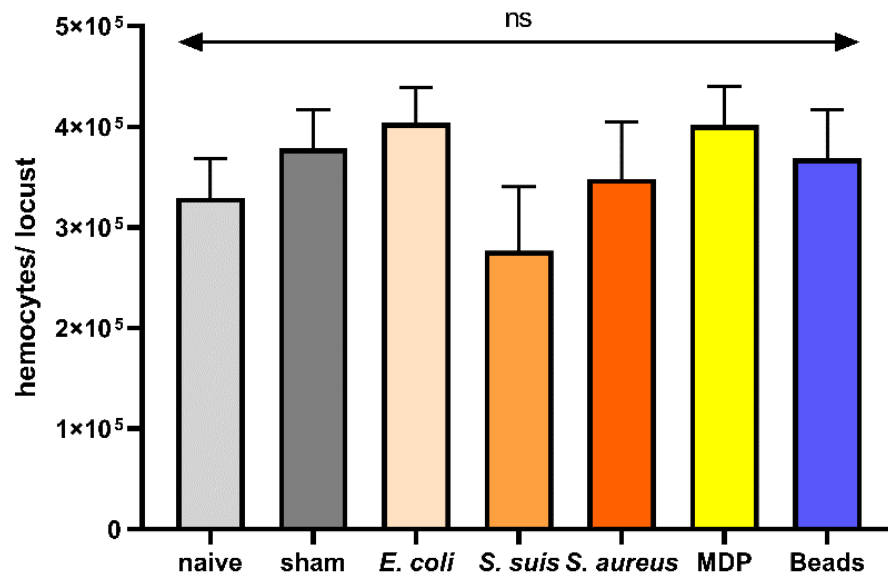

**Figure S2** Average numbers of hemocytes gained from adult locusts of different treatment groups after hemocyte preparation. Naive:  $329,389 \pm 39,257$  hemocytes per locust ( $n=15$ ,  $\pm$  SEM), sham:  $378,785 \pm 38,210$  hemocytes per locust ( $n=16$ ,  $\pm$  SEM), *E. coli*:  $403,802 \pm 35,439$  hemocytes per locust ( $n=16$ ,  $\pm$  SEM), *S. suis*:  $276,694 \pm 63,512$  hemocytes per locust ( $n=6$ ,  $\pm$  SEM), *S. aureus*:  $348,333 \pm 56,789$  hemocytes per locust ( $n=3$ ,  $\pm$  SEM), MDP:  $401,750 \pm 38,366$  hemocytes per locust ( $n=3$ ,  $\pm$  SEM), PMMA beads (2 $\mu$ m):  $368,834 \pm 47,834$  hemocytes per locust ( $n=2$ ,  $\pm$  SEM), statistical test: Kruskal Wallis-test with Dunn's multiple comparison test. (ns) not significant

**Table S1** Number of preparations with citrulline-positive hemocytes, with capsules and total preparations of first instar locust abdomens: sham injected,  $5 \times 10^5$  CFU heat-inactivated *E. coli* injected, 5 mM D-NMMA and  $5 \times 10^5$  CFU heat-inactivated *E. coli* injected and 5 mM L-NMMA and  $5 \times 10^5$  CFU heat-inactivated *E. coli* injected.

|                           |                                    | 6h       |                |                         |                         | 24h       |                |                         |                         |
|---------------------------|------------------------------------|----------|----------------|-------------------------|-------------------------|-----------|----------------|-------------------------|-------------------------|
|                           |                                    | sham     | <i>E. coli</i> | D-NMMA + <i>E. coli</i> | L-NMMA + <i>E. coli</i> | sham      | <i>E. coli</i> | D-NMMA + <i>E. coli</i> | L-NMMA + <i>E. coli</i> |
| <b>dorsal</b>             | with citrulline positive hemocytes | 0        | 0              | 2                       | 0                       | 0         | 23             | 21                      | 1                       |
|                           | with capsules                      | 0        | 5              | 9                       | 6                       | 0         | 24             | 23                      | 23                      |
| <b>ventral</b>            | with citrulline positive hemocytes | 0        | 0              | 6                       | 0                       | 0         | 24             | 14                      | 1                       |
|                           | with capsules                      | 0        | 2              | 3                       | 2                       | 1         | 13             | 7                       | 3                       |
| <b>total preparations</b> |                                    | <b>8</b> | <b>8</b>       | <b>9</b>                | <b>8</b>                | <b>24</b> | <b>24</b>      | <b>24</b>               | <b>23</b>               |

**Table S2** Number of preparations with citrulline-positive hemocytes, with capsules and total preparations of first instar locust abdomens: naive locusts, LB injected,  $5 \times 10^5$  CFU heat-inactivated *E. coli* injected,  $5 \times 10^5$  CFU heat-inactivated *S. suis* injected and  $5 \times 10^5$  CFU heat-inactivated *S. aureus* injected.

| <i>S. suis</i>            |                                    | 6h        |           |                |                | 24h       |           |                |                |
|---------------------------|------------------------------------|-----------|-----------|----------------|----------------|-----------|-----------|----------------|----------------|
|                           |                                    | naive     | sham      | <i>E. coli</i> | <i>S. suis</i> | naive     | sham      | <i>E. coli</i> | <i>S. suis</i> |
| <b>dorsal</b>             | with citrulline positive hemocytes | 1         | 2         | 3              | 5              | 0         | 6         | 35             | 33             |
|                           | with capsules                      | 0         | 1         | 13             | 10             | 0         | 1         | 35             | 25             |
| <b>ventral</b>            | with citrulline positive hemocytes | 0         | 1         | 1              | 1              | 0         | 5         | 34             | 19             |
|                           | with capsules                      | 0         | 0         | 2              | 2              | 0         | 1         | 13             | 4              |
| <b>total preparations</b> |                                    | <b>12</b> | <b>20</b> | <b>20</b>      | <b>20</b>      | <b>18</b> | <b>36</b> | <b>36</b>      | <b>36</b>      |

| <i>S. aureus</i>          |                                    | 6h        |           |                |                  | 24h       |           |                |                  |
|---------------------------|------------------------------------|-----------|-----------|----------------|------------------|-----------|-----------|----------------|------------------|
|                           |                                    | naive     | sham      | <i>E. coli</i> | <i>S. aureus</i> | naive     | sham      | <i>E. coli</i> | <i>S. aureus</i> |
| <b>dorsal</b>             | with citrulline positive hemocytes | 1         | 10        | 9              | 11               | 0         | 10        | 18             | 8                |
|                           | with capsules                      | 0         | 1         | 8              | 1                | 0         | 1         | 17             | 4                |
| <b>ventral</b>            | with citrulline positive hemocytes | 0         | 1         | 0              | 1                | 0         | 9         | 17             | 7                |
|                           | with capsules                      | 0         | 0         | 1              | 1                | 0         | 1         | 7              | 2                |
| <b>total preparations</b> |                                    | <b>12</b> | <b>12</b> | <b>12</b>      | <b>12</b>        | <b>18</b> | <b>18</b> | <b>18</b>      | <b>18</b>        |

**Table S3** Number of preparations with citrulline-positive hemocytes, with capsules and total preparations of first instar locust abdomens: A) LPS injection, B) MDP injection, C) PMMA beads injection, D) RVFV injection.

| A) LPS             |                                    | 6h   |           |            | 24h  |           |            |
|--------------------|------------------------------------|------|-----------|------------|------|-----------|------------|
|                    |                                    | sham | LPS 10 ng | LPS 100 ng | sham | LPS 10 ng | LPS 100 ng |
| dorsal             | with citrulline positive hemocytes | 0    | 0         | 0          | 0    | 1         | 0          |
|                    | with capsules                      | 0    | 0         | 0          | 0    | 0         | 0          |
| ventral            | with citrulline positive hemocytes | 0    | 0         | 0          | 4    | 5         | 4          |
|                    | with capsules                      | 0    | 0         | 0          | 0    | 0         | 0          |
| total preparations |                                    | 16   | 16        | 16         | 24   | 24        | 24         |

| B) MDP             |                                    | 6h    |      |     |                | 24h   |      |     |                |
|--------------------|------------------------------------|-------|------|-----|----------------|-------|------|-----|----------------|
|                    |                                    | naive | sham | MDP | <i>E. coli</i> | naive | sham | MDP | <i>E. coli</i> |
| dorsal             | with citrulline positive hemocytes | 0     | 1    | 2   | 10             | 2     | 9    | 3   | 17             |
|                    | with capsules                      | 0     | 0    | 0   | 10             | 0     | 0    | 10  | 1              |
| ventral            | with citrulline positive hemocytes | 0     | 1    | 0   | 3              | 1     | 7    | 0   | 17             |
|                    | with capsules                      | 0     | 0    | 0   | 4              | 0     | 0    | 0   | 9              |
| total preparations |                                    | 12    | 12   | 12  | 12             | 18    | 18   | 18  | 18             |

| C) beads           |                                    | 6h   |                |            |             | 24h  |                |            |             |
|--------------------|------------------------------------|------|----------------|------------|-------------|------|----------------|------------|-------------|
|                    |                                    | sham | <i>E. coli</i> | beads 2 µm | beads 20 µm | sham | <i>E. coli</i> | beads 2 µm | beads 20 µm |
| dorsal             | with citrulline positive hemocytes | 1    | 0              | 0          | 0           | 1    | 18             | 1          | 1           |
|                    | with capsules                      | 0    | 11             | 0          | 0           | 1    | 17             | 0          | 1           |
| ventral            | with citrulline positive hemocytes | 0    | 4              | 0          | 0           | 0    | 17             | 1          | 0           |
|                    | with capsules                      | 0    | 5              | 0          | 0           | 0    | 13             | 0          | 0           |
| total preparations |                                    | 12   | 12             | 12         | 12          | 18   | 18             | 18         | 18          |

| D) RVFV            |                                    | 6h    |      |      |                | 24h   |      |      |                |
|--------------------|------------------------------------|-------|------|------|----------------|-------|------|------|----------------|
|                    |                                    | naive | sham | RVFV | <i>E. coli</i> | naive | sham | RVFV | <i>E. coli</i> |
| dorsal             | with citrulline positive hemocytes | 1     | 0    | 0    | 0              | 1     | 1    | 0    | 16             |
|                    | with capsules                      | 0     | 0    | 0    | 11             | 1     | 0    | 1    | 16             |
| ventral            | with citrulline positive hemocytes | 0     | 0    | 0    | 1              | 1     | 0    | 0    | 15             |
|                    | with capsules                      | 0     | 0    | 0    | 6              | 0     | 0    | 0    | 10             |
| total preparations |                                    | 12    | 12   | 12   | 12             | 18    | 18   | 18   | 18             |

**Table S4** Numbers of adult locust primary hemocyte culture. Raw data can be found in a separate file (Table S4\_Raw data.xlsx).

| trial            | n(biologicals replicates) | treatment        | n(locusts) | n(culture wells) | n(images) |
|------------------|---------------------------|------------------|------------|------------------|-----------|
| <i>S. suis</i>   | 6                         | naïve            | 18         | 18               | 95        |
|                  |                           | sham             | 18         | 18               | 96        |
|                  |                           | <i>S. suis</i>   | 18         | 18               | 95        |
|                  |                           | <i>E. coli</i>   | 18         | 18               | 94        |
| <i>S. aureus</i> | 3                         | naïve            | 9          | 6                | 60        |
|                  |                           | sham             | 9          | 6                | 60        |
|                  |                           | <i>S. aureus</i> | 9          | 6                | 60        |
|                  |                           | <i>E. coli</i>   | 9          | 6                | 60        |
| MDP              | 3                         | naïve            | 9          | 6                | 60        |
|                  |                           | sham             | 9          | 6                | 60        |
|                  |                           | MDP              | 9          | 6                | 60        |
|                  |                           | <i>E. coli</i>   | 9          | 6                | 60        |
| beads            | 3                         | naïve            | 9          | 12               | 36        |
|                  |                           | sham             | 9          | 12               | 36        |
|                  |                           | beads            | 9          | 12               | 37        |
|                  |                           | <i>E. coli</i>   | 9          | 12               | 35        |
| total            |                           |                  | 180        | 168              | 1004      |
